# Supplementary material for: Mixed-polarization phenotype of ascites-associated macrophages in human ovarian carcinoma: Correlation of CD163 expression, cytokine levels and early relapse
Source: PubMed Central journal article supplement — Int J Cancer. 2013 Jul 19;134(1):32–42. doi: 10.1002/ijc.28335 (PMC4232932; doi:10.1002/ijc.28335), 2013-07-19
Supplement: ijc0134-0032-sd1.pdf [file ijc0134-0032-sd1.pdf]

## Supplemental Figures and Tables

### **Mixed-polarization phenotype of ascites-associated macrophages in human ovarian carcinoma: correlation of CD163 expression, cytokine levels and early relapse**

Silke Reinartz<sup>1</sup>, Tim Schumann<sup>2</sup>, Florian Finkernagel<sup>2</sup>, Annika Wortmann<sup>2</sup>, Julia M. Jansen<sup>1</sup>, Wolfgang Meissner<sup>2</sup>, Michael Krause<sup>2</sup>, Anne Schwörer<sup>1,2</sup>, Uwe Wagner<sup>1</sup>, Sabine Müller-Brüsselbach<sup>2#</sup> and Rolf Müller<sup>2#</sup>

<sup>1</sup>Clinic for Gynecology, Gynecological Oncology and Gynecological Endocrinology  
Philipps University, Baldingerstraße  
35033 Marburg, Germany

<sup>2</sup>Institute of Molecular Biology and Tumor Research (IMT)  
Philipps University, Emil-Mannkopff-Strasse 2  
35032 Marburg, Germany

<sup>#</sup>SMB and RM: shared senior authorship

<sup>#</sup>Email: [smb@imt.uni-marburg.de](mailto:smb@imt.uni-marburg.de), [rmueller@imt.uni-marburg.de](mailto:rmueller@imt.uni-marburg.de)

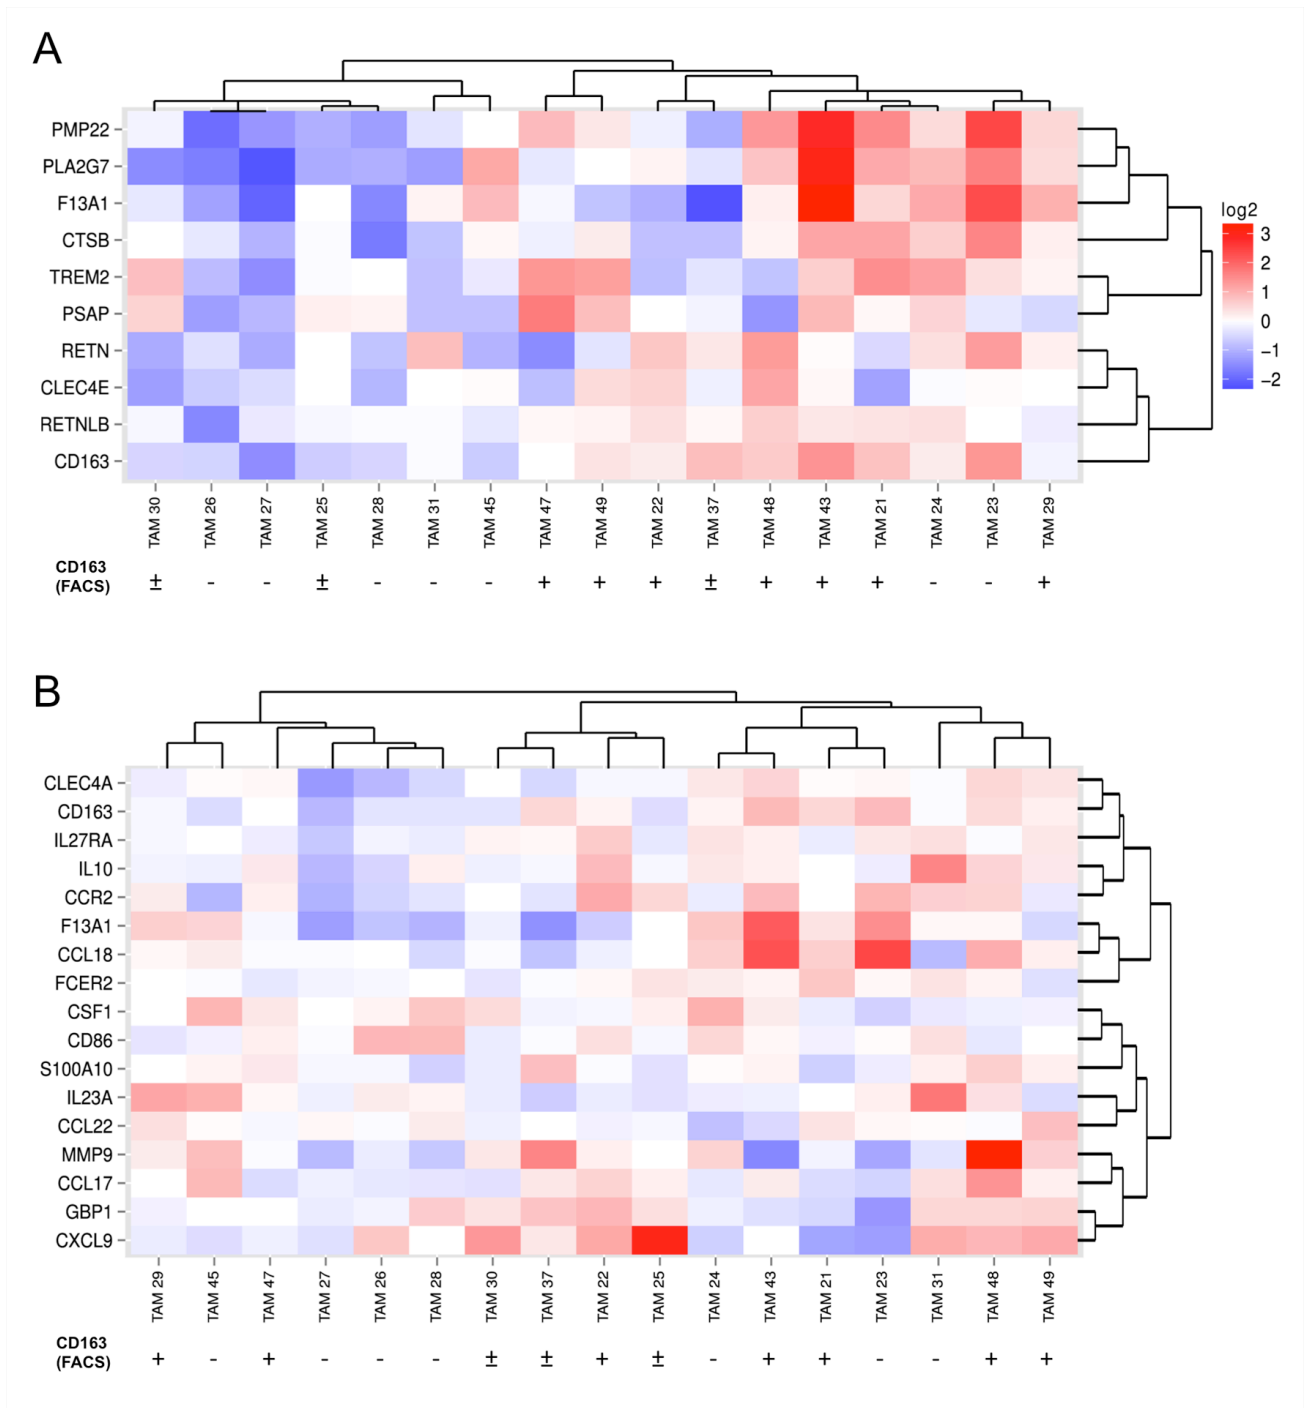

**Figure S1. CD163 surface expression is unrelated to M2 gene signatures.** Hierarchical clustering of TAM samples according to their similarity with (A) the Ghassabeh signature, a gene set common to type II cytokine-associated murine myeloid cells<sup>15</sup>, and (B) the “Beyer signature”, discriminating M1- and M2-polarized human MDMs<sup>18</sup>. The corresponding surface expression of CD163 is shown below the heat maps (+, more than 5% above median; ±, median ± 5%; -, less than 5% below median).

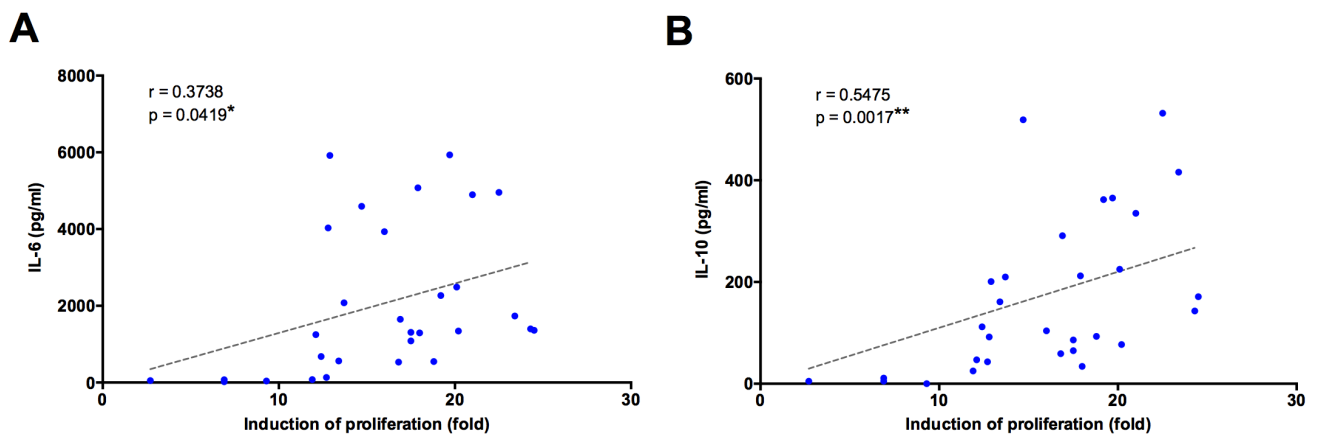

**Figure S2. Stimulation of ovarian carcinoma cell proliferation by cytokines from ascites.** SKOV-3 cells were serum-deprived and stimulated with 10% ascites from ovarian cancer patients for 6 days. Data were plotted against the levels of IL-6 (A) and IL-10 (B) in the ascites samples. \*,  $p < 0.05$ ; \*\*,  $p < 0.01$  by Pearson's  $r$  correlation.

Methods: The MTT (3-(4,5-dimethylthiazol-2-yl)-2,5-diphenyl tetrazolium bromide) assay (Sigma-Aldrich) was used to assess the influence of ascites or defined cytokines on the proliferation of the human ovarian cancer cell line SKOV-3 (ATCC, HTB-77). SKOV-3 cells were seeded in triplicates on 96-well plates ( $1 \times 10^3$  per well) in serum-deprived RPMI1640 medium (PAA) with or without 10% cell-free ascites from ovarian cancer patients. After six days, 10  $\mu$ l MTT (5 mg/ml) was added for 4 h at 37°C. MTT formazan crystals were dissolved with 10 % SDS + 0.01 M HCl (o/n at 37°C) and the color development was measured at A560 (reference A650). The proliferation index was calculated by calculating for each time point the corresponding ratio of  $A560^{\text{ascites}}/A560^{\text{control}}$ . In a single experiment, the MTT assay results were confirmed by a BrdU (5-bromo-2'-deoxyuridine)-based proliferation assay (Roche Applied Science, Mannheim, Germany).

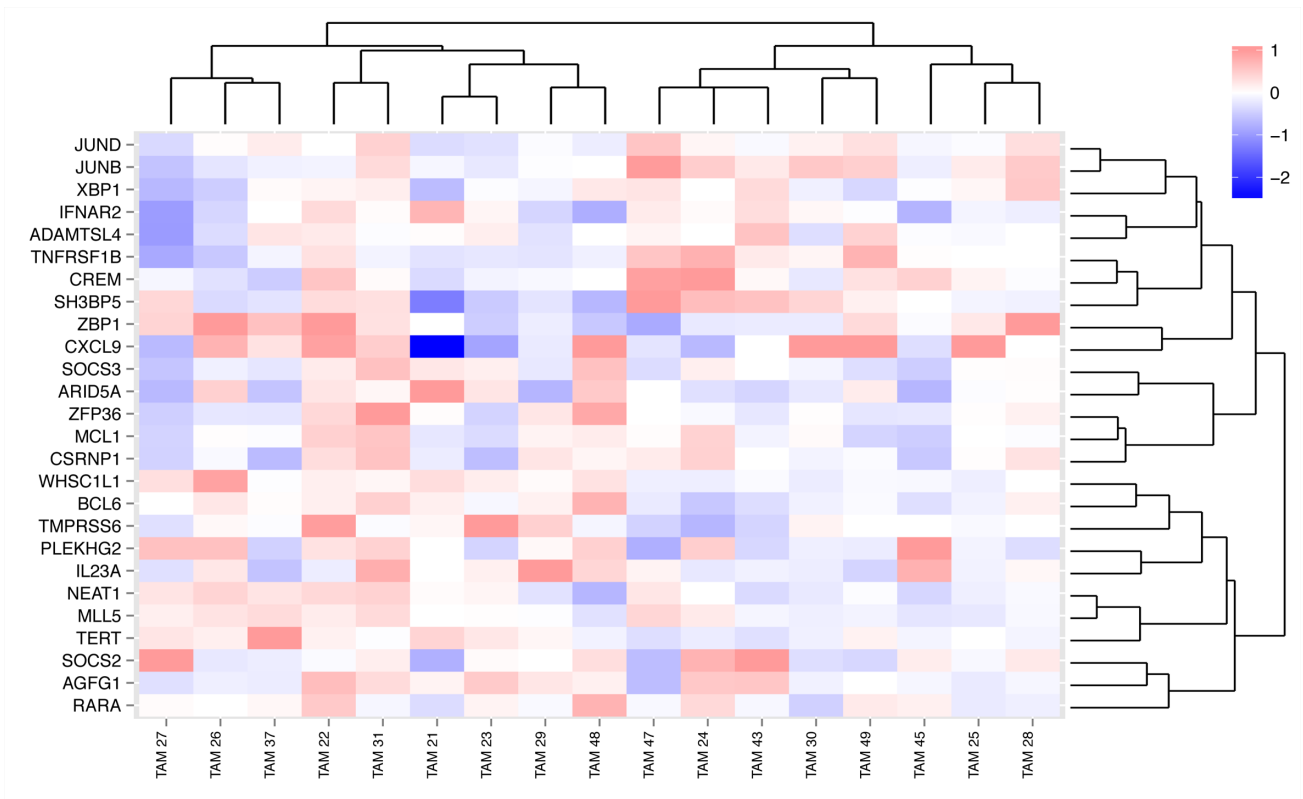

**Figure S3.** Hierarchical clustering of TAM samples biased on their similarity with a 65-gene STAT signature [24]. The corresponding surface expression of CD163 is shown below the heat maps (+, more than 5% above median;  $\pm$ , median  $\pm$  5%; -, less than 5% below median).

**Table S1: Patients included in the present study.**

| <b>Patient ID</b> | <b>age (y)</b> | <b>surgery date</b> | <b>Grade</b> | <b>Lymph nodes</b> | <b>Stage (FIGO)</b> | <b>Site</b> |
|-------------------|----------------|---------------------|--------------|--------------------|---------------------|-------------|
| TAM15             | 69             | 18.04.11            | G3           | pos                | III                 | Ovary       |
| TAM17             | 66             | 04.05.11            | G2           | pos                | III                 | Ovary       |
| TAM18             | 65             | 17.05.11            | G2           | neg                | III                 | Ovary       |
| TAM20             | 74             | 21.06.11            | G2-3         | nd                 | III                 | Ovary       |
| TAM21             | 48             | 29.07.11            | G2           | pos                | III                 | Ovary       |
| TAM22             | 71             | 17.10.11            | G2           | pos                | III                 | Ovary       |
| TAM23             | 72             | 05.01.12            | G2           | neg                | III                 | Ovary       |
| TAM24             | 35             | 09.01.12            | G2           | neg                | I                   | Ovary       |
| TAM25             | 76             | 30.01.12            | G2           | pos                | III                 | Ovary       |
| TAM26             | 74             | 14.02.12            | G2           | pos                | III                 | Ovary       |
| TAM27             | 72             | 05.03.12            | G3           | pos                | III                 | Ovary       |
| TAM28             | 71             | 08.03.12            | G3           | pos                | -                   | Peritoneum  |
| TAM29             | 46             | 13.03.12            | G3           | pos                | III                 | Ovary       |
| TAM30             | 54             | 23.04.12            | G3           | pos                | III                 | Ovary       |
| TAM31             | 60             | 22.05.12            | G3           | neg                | III                 | Ovary       |
| TAM32             | 53             | 20.06.12            | G1           | neg                | III                 | Ovary       |
| TAM33             | 65             | 02.07.12            | G2           | pos                | III                 | Ovary       |
| TAM36             | 56             | 15.08.12            | G2-3         | neg                | III                 | Ovary       |
| TAM37             | 61             | 06.09.12            | G2           | pos                | III                 | Ovary       |
| TAM38             | 53             | 08.10.12            | G2           | pos                | III                 | Ovary       |
| TAM39             | 71             | 18.10.12            | G3           | pos                | III                 | Ovary       |
| TAM41             | 39             | 13.11.12            | G3           | pos                | III                 | Ovary       |
| TAM42             | 44             | 05.12.12            | G3           | neg                | III                 | Ovary       |
| TAM43             | 55             | 24.01.13            | G3           | nd                 | III                 | Ovary       |
| TAM44             | 72             | 28.01.13            | G2           | pos                | -                   | Peritoneum  |
| TAM45             | 70             | 29.01.13            | G2           | nd                 | III                 | Ovary       |
| TAM46             | 61             | 04.02.13            | G3           | pos                | III                 | Ovary       |
| TAM47             | 85             | 25.02.13            | G2           | pos                | III                 | Ovary       |
| TAM48             | 62             | 28.02.13            | G2           | pos                | II                  | Ovary       |
| TAM49             | 75             | 05.03.13            | G3           | pos                | -                   | Peritoneum  |

nd, not determined

Reasons for exclusion of patients after isolation of TAMs were cancer-unrelated death shortly after surgery (n=2), histopathological identification as tumors other than serous ovarian carcinoma (n=3), neoadjuvant chemotherapy (n=1), insufficient TAM recovery (n=1) or extreme deviations in the expression of macrophage markers compared to all other samples (n=2).

**Table S2:****Correlation\* of CD163 surface expression with ascites cytokines.**

| Parameter 1                          | Parameter 2 | <i>n</i> | <i>r</i> | <i>p</i> | significance |
|--------------------------------------|-------------|----------|----------|----------|--------------|
| CD14 <sup>+</sup> CD163 <sup>+</sup> | IL-6        | 28       | 0.4163   | 0.0276   | *            |
| CD14 <sup>+</sup> CD163 <sup>+</sup> | IL-10       | 28       | 0.4573   | 0.0144   | *            |
| CD14 <sup>+</sup> CD163 <sup>+</sup> | LIF         | 28       | 0.3157   | 0.1017   | <i>ns</i>    |
| CD14 <sup>+</sup> CD163 <sup>+</sup> | CSF-1       | 19       | -0.1998  | 0.4122   | <i>ns</i>    |
| CD14 <sup>+</sup> CD163 <sup>+</sup> | TGFβ        | 21       | 0.0083   | 0.6943   | <i>ns</i>    |
| CD14 <sup>+</sup> CD163 <sup>+</sup> | VEGF-A      | 21       | 0.0663   | 0.2730   | <i>ns</i>    |
| CD14 <sup>+</sup> CD163 <sup>+</sup> | VEGF-C      | 24       | 0.0135   | 0.5890   | <i>ns</i>    |
| CD14 <sup>+</sup> CD163 <sup>+</sup> | ANGPTL4     | 23       | 0.0274   | 0.4504   | <i>ns</i>    |

\*Pearsons *r*; significant values ( $p < 0.05$ ) indicated in red.

**Table S3:****Correlations\* of ascites cytokine concentrations.**

| Cytokine | IL-6   | IL-10  | LIF    |
|----------|--------|--------|--------|
| IL-6     | -      | 0,0734 | 0,0002 |
| IL-10    | 0,0734 | -      | 0,0079 |
| LIF      | 0,0002 | 0,0079 | -      |
| Leptin   | 0,5732 | 0,3185 | 0,3850 |
| CSF-1    | 0,5660 | 0,2932 | 0,7576 |
| CCL2     | 0,8008 | 0,8041 | 0,2547 |
| TGFβ     | 0,0856 | 0,0224 | 0,0685 |
| VEGF-A   | 0,1329 | 0,0753 | 0,1747 |
| VEGF-C   | 0,7717 | 0,3246 | 0,8129 |

\**p*-values of Pearsons *r*,  $n = 19-28$ ;  
significant values ( $p < 0.05$ ) indicated in red.
